# Supplementary material
Source: Elsevier journal article supplement (https://www.sciencedirect.com/science/article/pii/S0300893214006150)
Supplement: mmc1 [file mmc1.pdf]

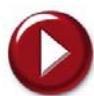**Material suplementario**

---

## Prevalencia de angina estable en España. Resultados del estudio OFRECE

Joaquín J. Alonso <sup>a,\*</sup>, Javier Muñoz <sup>b</sup>, Juan José Gómez-Doblas <sup>c</sup>,  
Gustavo Rodríguez-Roca <sup>d</sup>, José María Lobos <sup>e</sup>, Gaietà Permanyer-Miralda <sup>f</sup>,  
Manuel Anguita <sup>g</sup>, Francisco Javier Chorro <sup>h</sup> y Eulàlia Roig <sup>i</sup>,  
en representación de los colaboradores del estudio OFRECE <sup>◇</sup>

<sup>a</sup>*Servicio de Cardiología, Hospital Universitario de Getafe, Getafe, Madrid, España*

<sup>b</sup>*Instituto de Ciencias de la Salud, Universidad de A Coruña, INIBIC, A Coruña, España*

<sup>c</sup>*Servicio de Cardiología, Hospital Clínico Universitario Virgen de la Victoria, Málaga, España*

<sup>d</sup>*Centro de Salud La Puebla de Montalbán, Toledo, España*

<sup>e</sup>*Centro de Salud Villablanca, Madrid, España*

<sup>f</sup>*Servicio de Cardiología, Hospital Universitario Vall d'Hebron, Barcelona, España*

<sup>g</sup>*Servicio de Cardiología, Hospital Reina Sofía, Córdoba, España*

<sup>h</sup>*Servicio de Cardiología, Hospital Clínico Universitario de Valencia, Valencia, España*

<sup>i</sup>*Servicio de Cardiología, Hospital de la Santa Creu i Sant Pau, Barcelona, España*

---

#

**Anexo 1****COMITÉ DE DIRECCIÓN, COORDINADORES, INVESTIGADORES,  
COLABORADORES Y CENTRO DE LECTURA.****Comité de Dirección**

|                   |                                                                                                                                                                                                                                                                                                                                                                      |
|-------------------|----------------------------------------------------------------------------------------------------------------------------------------------------------------------------------------------------------------------------------------------------------------------------------------------------------------------------------------------------------------------|
| Comité Ejecutivo  | Juan José Gómez-Doblas, Servicio de Cardiología, Hospital Clínico Universitario Virgen de la Victoria, Málaga; Javier Muñoz, Instituto de Ciencias de la Salud, Universidad de A Coruña, A Coruña; Joaquín J Alonso Martín, Servicio de Cardiología, Hospital Universitario Fuenlabrada, Madrid; Eulalia Roig, Servicio de Cardiología, Hospital San Pau, Barcelona. |
| Comité Científico | Gustavo Rodríguez-Roca, Centro de Salud La Puebla de Montalbán, Toledo; José María Lobos, Centro de Salud Villablanca, Madrid; Gaietà Permanyer, Servicio de Cardiología, Hospital Universitario Vall d'Hebron, Barcelona; Manuel Anguita, Servicio de Cardiología, Hospital Reina Sofía, Córdoba                                                                    |

**Coordinadores, investigadores y colaboradores**

| CC.AA.    | Provincia | Investigador-Coordenador            | Investigadores Atención Primaria y colaboradores                                                                                                                                                                                                                                                                                                                           |
|-----------|-----------|-------------------------------------|----------------------------------------------------------------------------------------------------------------------------------------------------------------------------------------------------------------------------------------------------------------------------------------------------------------------------------------------------------------------------|
| Andalucía | Almería   | Jacinto Benítez Gil                 | Francisco Garzón Montero; Virginia Bueno del Campo; Carmen Montabes Pereira; Santiago López Fábrega; Francisco Javier Almecija Flores; Eduardo C. Mecáñez García. <b>Colaboradores:</b> D. Jesús Enrique Montoro Robles, Dña. Manuela González López                                                                                                                       |
|           | Cádiz     | Manuel Ruiz Ruiz                    | Juan Carlos Molina Deudero; Inmaculada País Mateos; Javier Rodríguez Conejo; Dolores Montero Fuentes-Guerra; Myrian Olivares Morales; Raquel de Lara Muñoz; Milagros Pérez López; Francisco Umbria Campoo; José María Tenorio Sánchez                                                                                                                                      |
|           | Córdoba   | Manuel Anguita Sánchez              | Emilio García Criado; Jorge Martínez de la Iglesia; Juana Redondo Sánchez; Enrique Martín Rioboo; Juana María González Barranco; Francisco Javier Ruiz Moruno; María Auxiliadora Cabanás Espejo; Trinidad Lechuga Varona; Cristina Aguado Taberne; Juan José García Gallego. <b>Colaboradores:</b> Antonia Calero Espino                                                   |
|           | Granada   | Pablo Toledo Frías                  | Nieves Hitos Henares; Rosario López Bueno; Adoración Caba Martín; Concepción Molina Serrano; Concepción Macía Canon; Pedro Tejeda Paredes; Antonieta Maldonado Larroque. <b>Colaboradores:</b> Dña. Amparo Arrabal Martín, Dña. Agustina Matilla Marcos                                                                                                                    |
|           | Huelva    | Carlos Sánchez González             | Antonio Ortega Carpio; M <sup>a</sup> Eloisa Arias Fortes; Javier Ferraro García; Migliane Lima Costa; Isabel Ruiz Cumplido; Pilar Freire Pérez                                                                                                                                                                                                                            |
|           | Jaén      | Eduardo Vázquez Ruiz de Castroviejo | Ramiro Aguilera Tejero; Fermina Bruque Sánchez; Pablo Tallón Povedano; Lorenzo Escabias Andreu; Víctor Figueroa Cardona; Alejandro Pérez Milena; José Moraleda Martínez; M <sup>a</sup> Dolores Rodríguez Serrano                                                                                                                                                          |
|           | Málaga    | Juan Robledo Carmona                | Amparo Aragón Ramírez; Carlos Gutiérrez Maturana Camañes; Concepción Cañero Criado; Cristina Delgado Utrera; Dolores Muñoz Galán; Ignacio Boto Gutiérrez; Juan Luis Villamor Bueno; Vicente Villatoro Jiménez; Victoria Alcaraz Martínez. <b>Colaboradores:</b> Dña. Belén Pajariño Gallego, Dña. Jacinta Meléndez Ortigosa, D. Vicente Raimundo Arrabal Pérez, D. Alberto |

|                        |             |                                                                                 |                                                                                                                                                                                                                                                                                                                                                                                                                                                   |
|------------------------|-------------|---------------------------------------------------------------------------------|---------------------------------------------------------------------------------------------------------------------------------------------------------------------------------------------------------------------------------------------------------------------------------------------------------------------------------------------------------------------------------------------------------------------------------------------------|
|                        |             |                                                                                 | Márquez López, Dña. María del Pilar Aguilar Trujillo                                                                                                                                                                                                                                                                                                                                                                                              |
|                        | Sevilla     |                                                                                 | Antonio Casco Gallardo                                                                                                                                                                                                                                                                                                                                                                                                                            |
| Aragón                 | Huesca      | Javier Escota Villanueva;<br>Mariano Rodríguez Torrente                         | Eva Aguaron Joven; José María Borrel Martínez;<br>Juan Manuel Culebras Marco; Dolores Idañez Rodríguez; Teófilo Lorente Aznar; Ana Rivera Fuertes; Carmen Quintana Velasco; Carlos Aisa Arenaz; José María Barrio Navascues; José María Castillo Olivera. <b>Colaboradores:</b> Inmaculada Lera Omiste, Dña. Gemma Ciria                                                                                                                          |
|                        | Zaragoza    | Ricardo Gayán                                                                   | Ana Avelino Terrón; M <sup>a</sup> Luisa Aznar Arribas; Pedro J. Marín Velázquez; Adolfo Benito Jiménez; Rafael Vargas Arévalo; José Fernando Pina; Jesús Fco. Romeo Ladrero; M <sup>a</sup> Asunción Alfaro Lozano; José Javier Calvo García; Jesús María Lasso Moreno                                                                                                                                                                           |
| Principado de Asturias | Asturias    | Inés Möller Bustinza                                                            | M <sup>a</sup> Teresa Saldaña Hernández; Manuel Berrocal Varela; Amador Jenaro Carbajal Cocina; Francisco Javier Claros González; Natalia Juesas Fernández; Joaquín Prieto Gutiérrez; Agustín Sánchez Hernández; Purificación Seijo González; Ana Picasso Martínez de Ubago                                                                                                                                                                       |
| Castilla-La Mancha     | Albacete    | Moisés Barambio Ruiz                                                            | Antonio Cifuentes Verdú; Concepción Escolano Vizcaíno; Francisco Javier Ayllón Ayllón; Francisco Lorenzo Salido; Cándido Martínez García; María Concepción Casado Moragón; Antonio Martínez Lozano; Lucinio Carrión Valero; José Miguel Ocaña López; Mirian Martínez Carretero                                                                                                                                                                    |
|                        | Ciudad Real | Luis Ruiz-Valdepeñas Herrero                                                    | Raquel Bañón García; M <sup>a</sup> Teresa Alcaide Cornejo; Cristina Herráiz Serrano; Antonio Guindas Ruiz; Andrés Herrera Canales; Antonio-Lorenzo Ruiz Serrano; Francisco de Asís Asenjo Hernández; Angel Fermín Pérez Sánchez; Alfonso Ruiz-Póveda García-Rojo; M <sup>a</sup> Isabel Ariza Sánchez                                                                                                                                            |
|                        | Cuenca      | Antonio Melero Pita                                                             | Isidro Sanz Polo; Rafael Morilla Ramilo; Joaquín Román López Villar; Fernando Madero López; Alfredo Cabrejas Sánchez; Rosa M <sup>a</sup> Cejudo Serrano; Jesús Buendía Bermejo; Sagrario Saiz Santos; Adoración Romero Saiz; Julia Martín Lezana                                                                                                                                                                                                 |
|                        | Toledo      | Luis Rodríguez Padial                                                           | Raquel Parejo Míguez; José Ignacio Jaén Díaz; Angel Alonso Alía; Alberto Sepúlveda Martín; María Vega Martínez Escudero; Miguel Laborda Peralta; José María Jiménez Rodríguez; M <sup>a</sup> Angeles Adán Valero; Francisco Javier Alonso Moreno; Carmen Ramos López. <b>Colaboradores atención primaria:</b> Dña. Irene Martínez Giner, D. Jesús Adrián Sifuentes Hernández, Dña. María Dolores Martínez Malabia, Dña. Victoria Madiedo Acosta. |
| Castilla y León        | Ávila       | Igor Molina Puente                                                              | Miguel Angel Fernández Gutiérrez; Carlos de Cabo González; Lidia Sastre Jiménez; Fco. Javier Ríos Almarza; Blanca Noreña Delgado; Cesarina Rivas Hernández; Carlos Javier García Gómez; Juan Luis Martín Clavo; Alfonso Carlos Caro Picón; Benigno Sánchez Martín                                                                                                                                                                                 |
|                        | Burgos      | Germán Pérez Ojeda                                                              | Angel María Olea Movilla; Pedro Luis Estables Recansens; Lucinio Anaya Bernabe; Carmen Caballero Abad; Jesús García Cuadrillero; M <sup>a</sup> Felisa Lara Caballero; Benito Sanz Mozo; Felipe Eulalio Martín Rosón; M <sup>a</sup> Cruz González González                                                                                                                                                                                       |
|                        | León        | Norberto Alonso Orcajo;<br>Raúl Carbonell de Blas;<br>Cristina Pascual Vicente; | Leonor Martín Santín; M <sup>a</sup> Isabel Fernández Marassa; Mercedes García de Celis; Elena Fernández Mielgo; Faustino Sánchez Sanmartino; Margarita Gallego de                                                                                                                                                                                                                                                                                |

|          |            |                                              |                                                                                                                                                                                                                                                                                                                                                                                                                                                                                |
|----------|------------|----------------------------------------------|--------------------------------------------------------------------------------------------------------------------------------------------------------------------------------------------------------------------------------------------------------------------------------------------------------------------------------------------------------------------------------------------------------------------------------------------------------------------------------|
|          |            | Agustín Romero Blanco                        | la Varga; Angel Novoa Mato; Ana Isabel Barragán Marín; Jesús Marino Villamar Berceruelo.                                                                                                                                                                                                                                                                                                                                                                                       |
|          | Palencia   | Chema Asín Guillén                           | Juan Antonio Losmozos Sánchez; José Luis Durand Eguiluz; María Carmen Monge González; Enrique de Inés Martín; José Manuel Zumel Elices; Juan Manuel Durantez Cacharro; Tomás Manzano Benito; Isaac Alcalde García; M <sup>a</sup> Eugenia Barón Laguna                                                                                                                                                                                                                         |
|          | Salamanca  | Javier Jiménez Candil                        | Javier García Izquierdo; Julio Guerrero del Olmo; Luis García Ortiz; Carlos Hernán-Pérez Leal; José Calama Becerro; Carmen de Antonio Jiménez; Manuel Becerro Cereceda                                                                                                                                                                                                                                                                                                         |
|          | Segovia    | Carlos Junquera Planas                       | Emilio García Ortega; Rosa María Fernández Santa Teresa; M <sup>a</sup> Concepción Manrique de la Fuente; Juan Francisco Gil García; Martín Merino Segovia; Fernando Mondejar Quirós; Javier González Perlado; Ana Isabel Herrero Cecilia; José de Pablo Álamo                                                                                                                                                                                                                 |
|          | Soria      | Valentín del Villar Sordo                    | M <sup>a</sup> Jesús de Pablo Ramos; Ana M <sup>a</sup> Cabrerizo Puente; M <sup>a</sup> Antonia Hernández Caballero; Antonio Alberto Gil Gómez; Francisco Javier Martínez Sanz; Luis Gutiérrez Moreno; Elena de Pablo Ramos; Ramón García Martínez; Angel Lafuente Esteban; Gema Borque Molinos                                                                                                                                                                               |
|          | Valladolid | María Jesús Rollán Gómez                     | Rocío Velasco Pastor; M <sup>a</sup> Jesús Aller de la Fuente; Mercedes Redondo Valdeolillos; Jesús María Aguilar García; Verónica Casado Vicente; Elpidio García Ramón; Luis Angel Herrán Oteruelo; Jesús Francisco García Rodríguez; Enrique Sanz Monedero; Ruperto Sanz Cantalapie <b>Colaborador:</b> D. Miguel Angel Morales Torres                                                                                                                                       |
|          | Zamora     | José Antonio Ortiz de Murua López            | Angela Nistal Ramos; Francisco Javier Delgado Rodríguez; Luis Garrote Gutiérrez; Antonia Refoyo Enríquez; M <sup>a</sup> Dolores Rodríguez Martín; Pedro Martín Martín; Clodoaldo Pérez Ramos; Mercedes Prieto Mantellán; Gabriel González Panero; Alberto Jiménez Meléndez                                                                                                                                                                                                    |
| Cataluña | Barcelona  | Amparo Álvarez Auñón;<br>Vicens Brossa Loidí | Sandra Sabarich Flores; Judit Novo Salvador; Montserrat Lordés Lordés; María Eugenia Pérez Domínguez; Telma Cristina Vicentín; Francisco Javier Martínez Quílez; Francisco Javier Avilés Fernández; Laura Díaz Gete; Alicia Mostazo Muntané; Amelia Espinosa Santana; Antonia Llauger Roselló; M <sup>a</sup> Dolors Moriano García; Jordi Nadal Echevarria; M <sup>a</sup> Angels Salvador Millán; Herminio Moliner Lizondo. <b>Colaboradora:</b> Dña. Monserrat Roca Vilalta |
|          | Girona     | Joan Sala Montero                            | Josep Gil Yubero; Ferrán Cordón Granados; Montse Lloveras Clos; Emili Marco Segarra; Ramón Creus Bosch; Carmen López Sanmartín; Dídac Parramón i Font; Begoña Santana de Carlos; Cristina Servent Batlle. <b>Colaboradoras :</b> Dña. Judith Pinsach Garanger, Laura Vegas Fernández                                                                                                                                                                                           |
|          | Lleida     | Fernando Worner Díz                          | Jorge Soler González; Marta Ortega Bravo; Antonio Rodríguez Rosich; Plácido Santafe Soler; Eduard Peñascal Pujol; José Masamunt Jove; José Luis Morera Serra; Olga Pérez Queiruga; Antoni V. Plana Blanco                                                                                                                                                                                                                                                                      |
|          | Tarragona  | Jordi Mercé Klein                            | Merce Peri Viñes; Elisabeth Salsench Serrano; Eva María Oya Girona; Francisco Martín Luján; Rosa María Lara Ibáñez; Rafael Albiol Lluís; Ferrán                                                                                                                                                                                                                                                                                                                                |

|                      |             |                                    |                                                                                                                                                                                                                                                                                                            |
|----------------------|-------------|------------------------------------|------------------------------------------------------------------------------------------------------------------------------------------------------------------------------------------------------------------------------------------------------------------------------------------------------------|
|                      |             |                                    | Grifoll Ruiz; Irene Pascual Palacios; Dolores Gazol Soler                                                                                                                                                                                                                                                  |
| Comunidad Valenciana | Alicante    | Alberto Cordero Fort               | Manuel Carlos Salas Tomás; Rosario García Santafe; Nieves Gómez Moreno; Salvador Pertusa Martínez; Soledad García Bevia; Luis Richard Rodríguez; Alberto Asencio Aznar. <b>Colaboradora</b> : María Adsuar Adán                                                                                            |
|                      | Castellón   | Lorenzo Fácila Rubio               | José Vicente Herrero Ballestar; Beatriz Sánchez-Peral Sánchez; Amparo Antón Aguilera; M <sup>a</sup> José Manrique Costa; Manuel Batalla Sales; María Isabel Martí Giner; María Teresa Aguilar Arnau; M <sup>a</sup> Angeles Goterris Pinto; M <sup>a</sup> Dolores Aicart Fort; M. José Monedero          |
|                      | Valencia    | Francisco Ridocci Soriano          | Fernando Quiles Añón; Juan Carlos Beguer Miquel; Asunción Girbes Revert; M <sup>a</sup> Angels Pages Juanola; María Teresa Villalba Calatayud; Amparo Castro Lorente                                                                                                                                       |
| Extremadura          | Badajoz     | Antonio Merchán Herrera            | Macarena Candela Maestú; Juan José Dorado Martín; Antonio García Concellón; María S. Gil Llinás; Calixta Mantilla Calderón; Manuel Martínez de la Concha; Beatriz Pardo Díaz de Entresotos; Rosario T. Trinidad Ramos; José A. Morales Ruiz                                                                |
|                      | Cáceres     | José Javier Gómez Barrado          | Fernando Pérez Escanilla; Carlos Arjona Mateos; Dimas Igual Fraile; Amparo Gómez Espárrago; M. Socorro Gacto Fernández; José Polo García; Sebastián Traba Hernández; Sabina Rodríguez Borreguero; Alfonso Barquilla García                                                                                 |
| Galicia              | A Coruña    | José Angel Rodríguez Fernández     | David Bouza Álvarez; Luis Buendía Fernández; Francisco Javier Maestro Saavedra; Manuel Barral Castro; Juan Manuel Peteiro Martínez; José Luis Díaz Santiago; Concepción Blanco Sánchez; Cristina Iglesias Díaz                                                                                             |
|                      | Lugo        | Ana Testa Fernánde                 | Germán Fernández López; José Enrique Cajiao Bonome; José Manuel Menéndez Tamargo; Cristina Arijón Barazal; Vicente Quirós Madariaga; Domingo D. García Rivas; Domingo Fernández Méndez; M <sup>a</sup> Teresa García Novo; Bernardino Pardo Teijeiro                                                       |
|                      | Ourense     | Manuel García García               | Rosario Calle Custodio; Alberto J. del Alamo Alonso; Pedro Blanco Iglesias; Antonio Pedreira Penedo; M <sup>a</sup> Dolores Antolín Novoa; Ana Veiga Vázquez; Agapito Diéguez Estévez; Jorge Lloveres Insua; Aida Robles Castiñeiras                                                                       |
|                      | Pontevedra  | Francisco Calvo Iglesias.          | Evangelina Filloy Miguez; José Carlos Sendín Sánchez; Xesús Fernández Núñez; Juan José Crespo Sabaris; José Rubio Panadeiros; M <sup>a</sup> Luisa Blázquez Ballesteros; Manuel Domínguez Sardiña; M <sup>a</sup> Begoña Porritt Lueiro; Manuel M <sup>a</sup> Lorenzo San Martín; Francisco López Sobrino |
| Islas Baleares       | Mallorca    | David Crémer Luengos.              | Natalia Feuerbach Achtel; Montserrat de la Torre Vidal; Alejandro Pizá Colom; Adriano Juan Mayrata Vicens; Cristina Gadea Ruiz; Catalina Picornell Yanes; Montserrat Sauleda Pares; Carmen López Moreno; Francisca Bestard Reus; Silvia Martín Delgado                                                     |
| Canarias             | Las Palmas  | M <sup>a</sup> Antonia Viña Liste. | Pedro J. Díaz Alayón; Luis Antonio Escalada Muñoz; Juan Pedro Jiménez Sarmiento; Beatriz Pérez López; Domingo Guerra Vega; Emilio Sánchez Carrión; Javier Santana Quilez; Gloria Calero González; Tomás González Rodríguez; Carmen Berrio Santana                                                          |
|                      | Sta Cruz de | Horacio Pérez Hernández.           | Nicolás Maffiotte Carrillo; Juan Francisco Tejera                                                                                                                                                                                                                                                          |

|                            |           |                                                  |                                                                                                                                                                                                                                                                                                                              |
|----------------------------|-----------|--------------------------------------------------|------------------------------------------------------------------------------------------------------------------------------------------------------------------------------------------------------------------------------------------------------------------------------------------------------------------------------|
|                            | Tenerife  |                                                  | Cabrera; Alfredo Bartolomé Andrés; Emma Navarro Brito ; Francisco José Castro Álvarez                                                                                                                                                                                                                                        |
| La Rioja                   | La Rioja  | Adrián Beloscar Llorca;<br>Alfonso Jiménez Galán | José Tomás Gómez Saenz; Juan Manuel Marrodan Adan; Julio Peña Angos; Alejandro Paradiñeiro Somoza; Jesús M <sup>a</sup> Gutiérrez de Bobadilla; José María Martínez Martínez; Ignacio Fernández Hurtado; Mikel Ugalde Olano; Juan José García Díaz; Oscar León Fernández                                                     |
| Comunidad de Madrid        | Madrid    | José María Serrano Antolín                       | Antonio Sánchez Serrano; Belén Muñoz Gómez; M <sup>a</sup> José García Sacristán; Rocío Balas Urea; M <sup>a</sup> José Rojas Giraldo; Mar Noguero Álvarez; Carlos Díaz Gómez-Calcerrada; Ignacio Arjona Anchoriz; Rocío Vello Cuadrado                                                                                      |
| Región de Murcia           | Murcia    | Manuel Villegas García                           | María Xania de Casas Fernández; Rafael Luquín Martínez; Antonio Javier Llorens Minguell; M <sup>a</sup> del Carmen Paniagua Merchán; Concepción Carvajal Lucerga; Montserrat Martínez Sánchez; M <sup>a</sup> Isabel Caceres López; M <sup>a</sup> José Miras Martínez; Manuel Haenelt Maguel; Ana Celia Melgar García       |
| Comunidad Foral de Navarra | Navarra   | Marisol Alcasena Juango                          | Vicente Estremera Urabayen; Juan Manuel Pérez Gómez; Ramón Villanueva Moreno; M <sup>a</sup> Teresa Salinas Videndo; M <sup>a</sup> del Mar Hernández Espinosa; Carlos Figuero Echeverria; José Manuel Calleja Pascual; Arturo Erlanz Abad; Jesús Javier Jurio Burgui                                                        |
| País Vasco                 | Álava     | Maruja Bello Mora                                | Jon Azkarate Zubiaur; M <sup>a</sup> Asunción Aldecoa Eguillor; Juan Francisco Pérez de San Román Setien; Laura Ortiz de Lazcano Herrera; Lucia Pereda López; María Angeles Calvo Gainzarain; Olga Ruiz de Arbulo Ruiz de Alegría; Juan Carlos Martín Fernández Landa; Luis Laborda González; Francisco Javier Blanco Cuadra |
|                            | Guipuzcoa | Esther Recalde                                   | José Ramón Chopitea Gabiola; Aintzane Abasolo García; Miguel Mier Cascallana                                                                                                                                                                                                                                                 |
|                            | Vizcaya   | Nekane Murga Eizagaetxebarría                    | Ana Isabel Izaguirre Berasategui; Juan Bautista Loizaga Horno; Cristina Lekube Angulo; José Angel Del Pozo Yruegas; Alazne Ramoneda Errazquin; Igone Asua Angulo; Epifanio Álvarez Grande; María Natividad De Soto Gorroño; Rosario Angulo Rivero                                                                            |

### Centro de lectura de los electrocardiogramas

| Centro                                         | Coordinadora         | Otros miembros del grupo                                                                                                                                                                                          |
|------------------------------------------------|----------------------|-------------------------------------------------------------------------------------------------------------------------------------------------------------------------------------------------------------------|
| Hospital Universitario de Fuenlabrada (Madrid) | Paula Awamleh García | Alejandro Curcio Ruigómez; Carmen Cristobal Valera; Adolfo Fontenla Cerezuela; Catherine Graupner Abad; Rosa María Jiménez Hernández; José María Serrano Antolín; Pedro Talavera Sánchez; Rodrigo Teijeiro Mestre |

Anexo 2. Formato de cuestionario de Rose utilizado en el estudio

CUESTIONARIO DE ANGINA

Cuestionario de Rose:

- (62) **¿Ha sentido alguna vez dolor, molestias u opresión en el pecho?** (en caso de diagnóstico de cardiopatía isquémica tratada, referir las preguntas a los últimos 3 meses)

  - Dolor
  - Molestias
  - Opresión
  - No (si la respuesta es no, no hay angina)  
[pasar a pregunta 71]
  - Datos insuficientes
- (63) **¿Lo siente cuando sube una cuesta o camina con rapidez?**

  - Sí
  - No
  - Nunca sube cuestas ni camina con rapidez
  - No procede
  - Datos insuficientes
- (64) **¿Lo siente cuando camina a paso ordinario en terreno llano?**

  - Sí
  - No
  - No procede
  - Datos insuficientes
- (65) **¿Qué hace si el dolor o la molestia le aparecen al andar?**

  - Se para o camina más despacio
  - Continúa
  - No procede
  - Datos insuficientes

(señalar 1 si el sujeto continúa andando después de la administración de nitratos sublinguales)
- (66) **Si se detiene, ¿qué sucede?**

  - Se siente aliviado
  - No se siente aliviado
  - No procede
  - Datos insuficientes
- (67) **¿En cuánto tiempo cede el dolor?**

  - 10 min. o menos
  - Más de 10 min.
  - No procede
  - Datos insuficientes (9)
- (68) **¿Quiere señalar el lugar o lugares dónde nota el dolor o molestia?**  
(permite respuesta múltiple)

  - Región esternal (superior o media)
  - Región esternal (inferior)
  - Región anteroizquierda del tórax
  - Brazo izquierdo
  - Otras zonas del pecho
  - No procede
  - Datos insuficientes
- (69) **CLASIFICACIÓN del cuestionario de Rose**

  - No hay angina (si responden no a 1ª pregunta)
  - Angina segura (si responde Sí a 1ª pregunta, y también a la 2ª o 3ª, y que afirman detenerse cuando aparece dolor o nota alivio al detenerse, apareciendo en 10 min. o menos)
  - Angina dudosa (si responde Sí a 1ª pregunta, y también a la 2ª o 3ª, pero que continúan caminando al aparecer dolor o el dolor no cede si se detiene).
  - Dolor torácico atípico (si responde Sí a 1ª pregunta, pero el dolor, molestia u opresión no está relacionado con el esfuerzo)

**Tabla 1 material suplementario.**

**Prevalencia de angina segura según el cuestionario de Rose en función de la presencia o ausencia de los factores de riesgo cardiovascular y los antecedentes.**

| Factores de riesgo cardiovascular | Población sin el factor |       |     | Población con el factor |       |      |
|-----------------------------------|-------------------------|-------|-----|-------------------------|-------|------|
|                                   | %                       | IC95% |     | %                       | IC95% |      |
| Obesidad                          | 2,0                     | 1,6   | 2,4 | 3,8                     | 2,7   | 4,9  |
| Sobrepeso                         | 2,9                     | 2,2   | 3,6 | 2,2                     | 1,6   | 2,8  |
| Obesidad central                  | 1,5                     | 1,0   | 1,9 | 3,5                     | 2,7   | 4,3  |
| Hipercolesterolemia               | 1,3                     | 0,9   | 1,6 | 6,6                     | 5,1   | 8,1  |
| Diabetes                          | 2,1                     | 1,6   | 2,6 | 6,3                     | 4,0   | 8,5  |
| Fumador actual                    | 3,1                     | 2,5   | 3,7 | 1,0                     | 0,5   | 1,5  |
| HTA                               | 1,4                     | 0,9   | 1,8 | 4,1                     | 3,2   | 5,1  |
| Antecedentes                      | %                       | IC95% |     | %                       | IC95% |      |
| Diabetes                          | 2,0                     | 1,5   | 2,5 | 6,1                     | 4,0   | 8,1  |
| HTA                               | 1,3                     | 0,9   | 1,7 | 4,7                     | 3,6   | 5,8  |
| Accidente vascular cerebral       | 2,4                     | 2,0   | 2,9 | 6,6                     | 3,5   | 9,7  |
| Arteriopatía periférica           | 2,4                     | 1,9   | 2,9 | 9,8                     | 5,1   | 14,4 |
| Enfermedad pulmonar crónica       | 2,4                     | 1,9   | 2,9 | 6,1                     | 3,5   | 8,8  |
| Patología tiroidea                | 2,5                     | 2,0   | 3,0 | 3,6                     | 1,6   | 5,6  |
| Infarto agudo de miocardio        | 2,2                     | 1,7   | 2,6 | 17,6                    | 12,4  | 22,8 |
| Angina inestable                  | 1,8                     | 1,4   | 2,2 | 34,1                    | 24,2  | 44,0 |
| Revascularización quirúrgica      | 2,2                     | 1,8   | 2,7 | 36,9                    | 22,1  | 51,8 |
| Revascularización percutánea      | 2,2                     | 1,8   | 2,7 | 22,1                    | 12,7  | 31,5 |
| Implantación de marcapasos        | 2,5                     | 2,1   | 3,0 | 10,2                    | 2,2   | 18,2 |
| Implantación de DAI               | 2,5                     | 2,1   | 3,0 | 10,2                    | 2,2   | 18,2 |
| Cardiopatía isquémica             | 1,5                     | 1,1   | 1,8 | 24,3                    | 18,3  | 30,2 |
| Diagnóstico previo de IC          | 2,1                     | 1,7   | 2,6 | 18,0                    | 12,0  | 24,1 |

DAI: desfibrilador automático implantable; HTA: hipertensión arterial; IC: insuficiencia cardiaca; IC95%: intervalo de confianza del 95%;



Tabla 2 material suplementario

Prevalencia de angina confirmada en función de la presencia o ausencia de los factores de riesgo cardiovascular y los antecedentes.

| Factores de riesgo cardiovascular | Población sin el factor |       |     | Población con el factor |       |      |
|-----------------------------------|-------------------------|-------|-----|-------------------------|-------|------|
|                                   | %                       | IC95% |     | %                       | IC95% |      |
| Obesidad                          | 1,1                     | 0,8   | 1,4 | 1,9                     | 1,1   | 2,8  |
| Sobrepeso                         | 1,5                     | 0,9   | 2,0 | 1,2                     | 0,8   | 1,7  |
| Obesidad central                  | 0,7                     | 0,5   | 1,0 | 1,9                     | 1,3   | 2,5  |
| Hipercolesterolemia               | 0,5                     | 0,2   | 0,7 | 4,1                     | 2,8   | 5,4  |
| Diabetes                          | 1,1                     | 0,8   | 1,4 | 3,3                     | 1,5   | 5,0  |
| Fumador actual                    | 1,6                     | 1,1   | 2,0 | 0,7                     | 0,2   | 1,1  |
| HTA                               | 0,4                     | 0,2   | 0,6 | 2,5                     | 1,7   | 3,4  |
| Antecedentes                      | %                       | IC95% |     | %                       | IC95% |      |
| Diabetes                          | 1,1                     | 0,8   | 1,4 | 3,1                     | 1,5   | 4,8  |
| HTA                               | 0,4                     | 0,3   | 0,6 | 2,9                     | 2,0   | 3,8  |
| Accidente vascular cerebral       | 1,2                     | 0,9   | 1,6 | 5,1                     | 2,4   | 7,9  |
| Arteriopatía periférica           | 1,3                     | 0,9   | 1,6 | 6,6                     | 2,8   | 10,4 |
| Enfermedad pulmonar crónica       | 1,2                     | 0,8   | 1,6 | 3,9                     | 1,8   | 6,0  |
| Patología tiroidea                | 1,4                     | 1,0   | 1,7 | 1,7                     | 0,3   | 3,2  |
| Infarto agudo de miocardio        | 0,9                     | 0,6   | 1,2 | 17,6                    | 12,4  | 22,8 |
| Angina inestable                  | 0,5                     | 0,4   | 0,7 | 34,1                    | 24,2  | 44,0 |
| Revascularización quirúrgica      | 1,0                     | 0,7   | 1,3 | 36,9                    | 22,1  | 51,8 |
| Revascularización percutánea      | 1,0                     | 0,7   | 1,3 | 22,1                    | 12,7  | 31,5 |
| Implantación de marcapasos        | 1,3                     | 1,0   | 1,7 | 6,7                     | 0,4   | 13,0 |
| Implantación de DAI               | 1,3                     | 1,0   | 1,7 | 6,7                     | 0,4   | 13,0 |
| Cardiopatía isquémica             | 0,2                     | 0,1   | 0,3 | 24,3                    | 18,3  | 30,2 |
| Diagnóstico previo de IC          | 1,1                     | 0,8   | 1,4 | 10,6                    | 5,4   | 15,8 |

DAI: desfibrilador automático implantable; HTA: hipertensión arterial; IC: insuficiencia cardiaca; IC95%: intervalo de confianza del 95%;
